# Supplementary material
Source: PubMed Central journal article supplement (PMC3771708)
Supplement: supp_13-11673_IOVS-13-11673-s01.pdf [file supp_13-11673_IOVS-13-11673-s01.pdf]

## Supplementary Data

### 1. PCR primers

BGH pA for primers and probe

CCTCGACTGTGCCTTCTAGTTGCCAGCCATCTGTTGTTTGCCCCCTCCCCCGTGC  
CTTCCTTGACCCTGGAAGGTGCCACTCCCCTGTCCTTTCCTAATAAAATGAG  
GAAATTGCATCGCATTGTCTGAGTAGGTGTCATTCTATTCTGGGGGGTGGGGT  
GGGGCAGGACAGCAAGGGGGAGGATTGGGAAGACAATAGCAGGCATGCTGG  
GGA

TaqMan primers: Amplicon: 76bp

FQPCR BGH pA Forward primer: 5' CCACTCCCCTGTCCTTTCCT-3' (21nt, 76 ~ 96, Tm: 59, GC%: 57)

FQPCR BGH pA Probe: 5'- ATGCGATGCAATTTCTCA -3' (19nt, 122 ~ 104, Tm: 60.0, GC%: 42, 5'-FAM, 3'-Blackhole)

FQPCR BGH pA Reverse primer: 5'- CCCAGAAATAGAATGACACCTACTC-3' (25nt, 152 ~ 128, Tm: 58, GC%: 48)
